# Supplementary material
Source: PubMed Central journal article supplement (PMC3961043)
Supplement: NIHMS509871-supplement-Sci_Sig_Supp.pdf [file NIHMS509871-supplement-Sci_Sig_Supp.pdf]

## Supplementary Materials for

### The Small GTPase ARF6 Stimulates $\beta$ -Catenin Transcriptional Activity During WNT5A-Mediated Melanoma Invasion and Metastasis

Allie H. Grossmann, Jae Hyuk Yoo, James Clancy, Lise K. Sorensen, Alanna Sedgwick, Zongzhong Tong, Kirill Ostanin, Aaron Rogers, Kenneth F. Grossmann, Sheryl R. Tripp, Kirk R. Thomas, Crislyn D'Souza-Schorey, Shannon J. Odelberg,\* Dean Y. Li\*

\*To whom correspondence should be addressed. E-mail: dean.li@u2m2.utah.edu (D.Y.L.); sodelber@genetics.utah.edu (S.J.O.)

Published 5 March 2013, *Sci. Signal.* **6**, ra14 (2013)  
DOI: 10.1126/scisignal.2003398

#### The PDF file includes:

- Fig. S1. ARF6 knockdown does not alter total N-cadherin protein at the plasma membrane.
- Fig. S2. Quantification of immunoblots.
- Fig. S3. ARF6 knockdown drives  $\beta$ -catenin from the nucleus to N-cadherin.
- Fig. S4. ARF6, junctional  $\beta$ -catenin, and the canonical destruction complex.
- Fig. S5. SLIT2-ROBO1 and SecinH3 inhibit ARF6 activation.
- Fig. S6. Time course of  $\beta$ -catenin relocalization after ARF6 inhibition.
- Fig. S7. ARF6-dependent  $\beta$ -catenin transactivation and relative WNT production in melanoma cell lines.
- Fig. S8. WNT2 knockdown reduces ARF6 activation.
- Fig. S9. FZD4 knockdown reduces ARF6 activation.
- Fig. S10. WNT5A, ARF6, and  $\beta$ -catenin signaling in multiple human melanoma cell lines.
- Fig. S11. Cytohesin knockdown does not reduce ARF6 activation.
- Fig. S12.  $\beta$ -Catenin immunostaining of LOX melanoma xenograft tumors.
- Table S1. siRNA and shRNA sequences.
- Table S2. Primer sequences for RT-PCR.

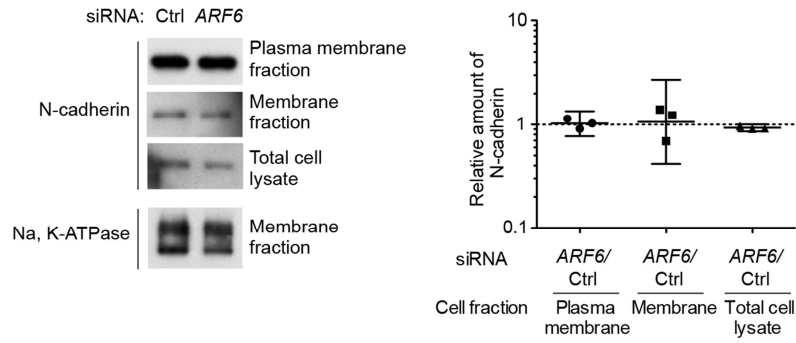

**Figure S1: ARF6 knockdown does not alter total N-cadherin protein at the plasma membrane.** N-cadherin immunoblots of plasma membrane fractions, membrane fractions, and total cell lysates from LOX cells treated with Control (Ctrl) or *ARF6* siRNAs. Scatter plot shows quantification of immunoblots. Data points = individual experiments ( $n=3$ ). Solid line within data points = geometric mean. Error bars = 95% CI.

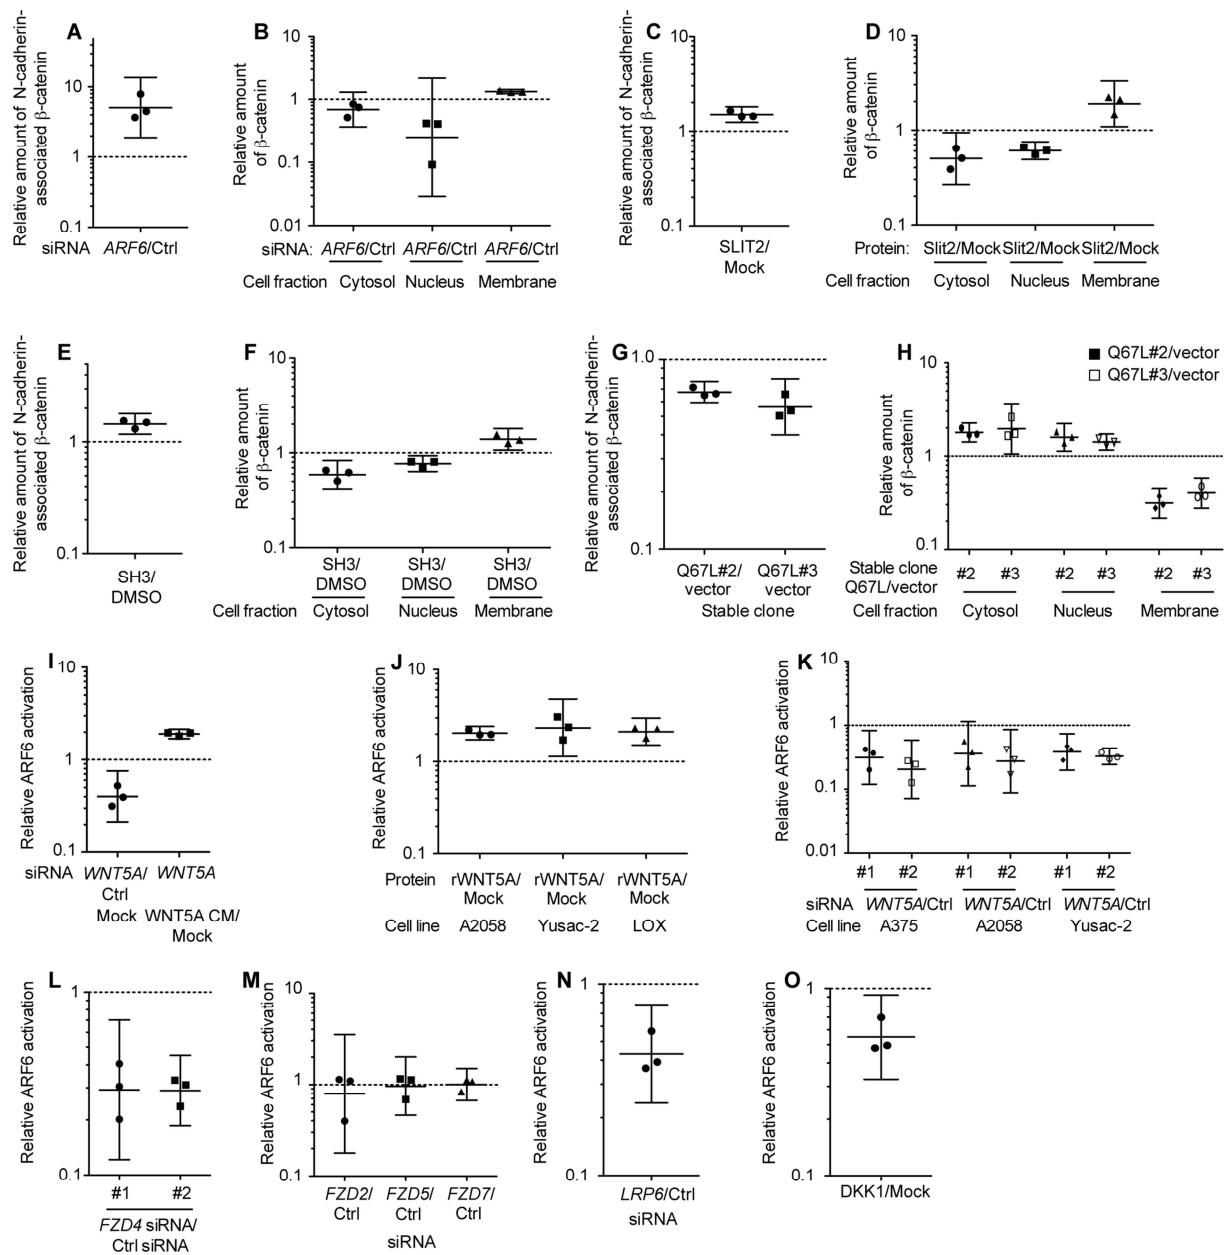

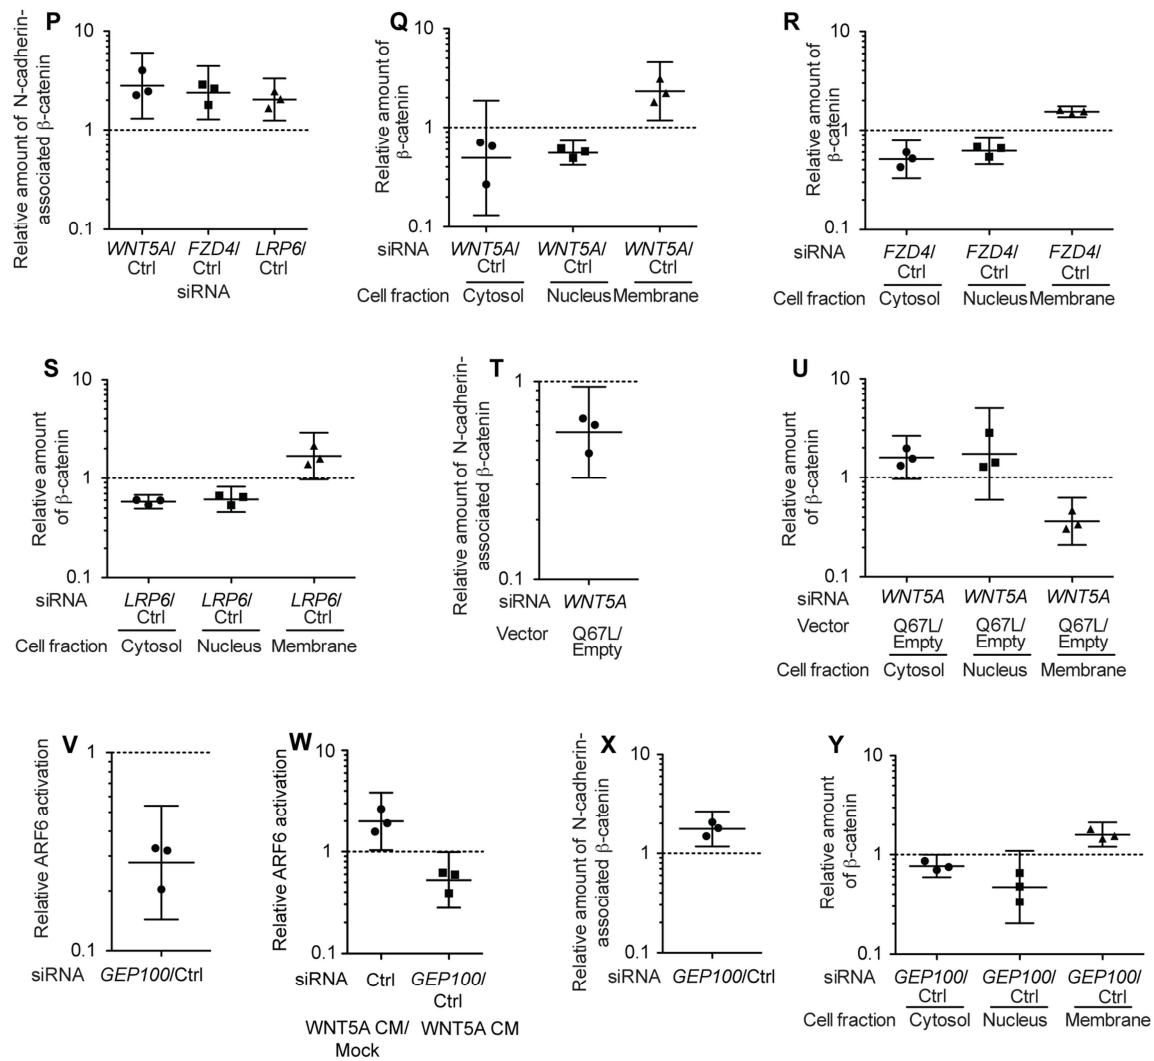

**Figure S2: Quantification of immunoblots from main figures.** Graphs relate to (A) Fig. 1A, (B) Fig. 1B, (C) Fig. 1C, (D) Fig. 1D, (E) Fig. 1E, (F) Fig. 1F, (G) Fig. 1G, (H) Fig. 1H, (I) Fig. 2A, (J) Fig. 2B, (K) Fig. 2C, (L) Fig. 2D and S9A, (M) Fig. 2E, (N) Fig. 2F, (O) Fig. 2G, (P) Figs. 3A and 3B, (Q) Fig. 3C, (R) Fig. 3D, (S) Fig. 3E, (T) Fig. 4A, (U) Fig. 4B, (V) Fig. 6A, (W) Fig. 6B, (X) Fig. 6C, (Y) Fig. 6D. (A) to (Y) Data points = individual experiments ( $n=3$ ). Solid line within data points = geometric mean. Error bars = 95% CI.

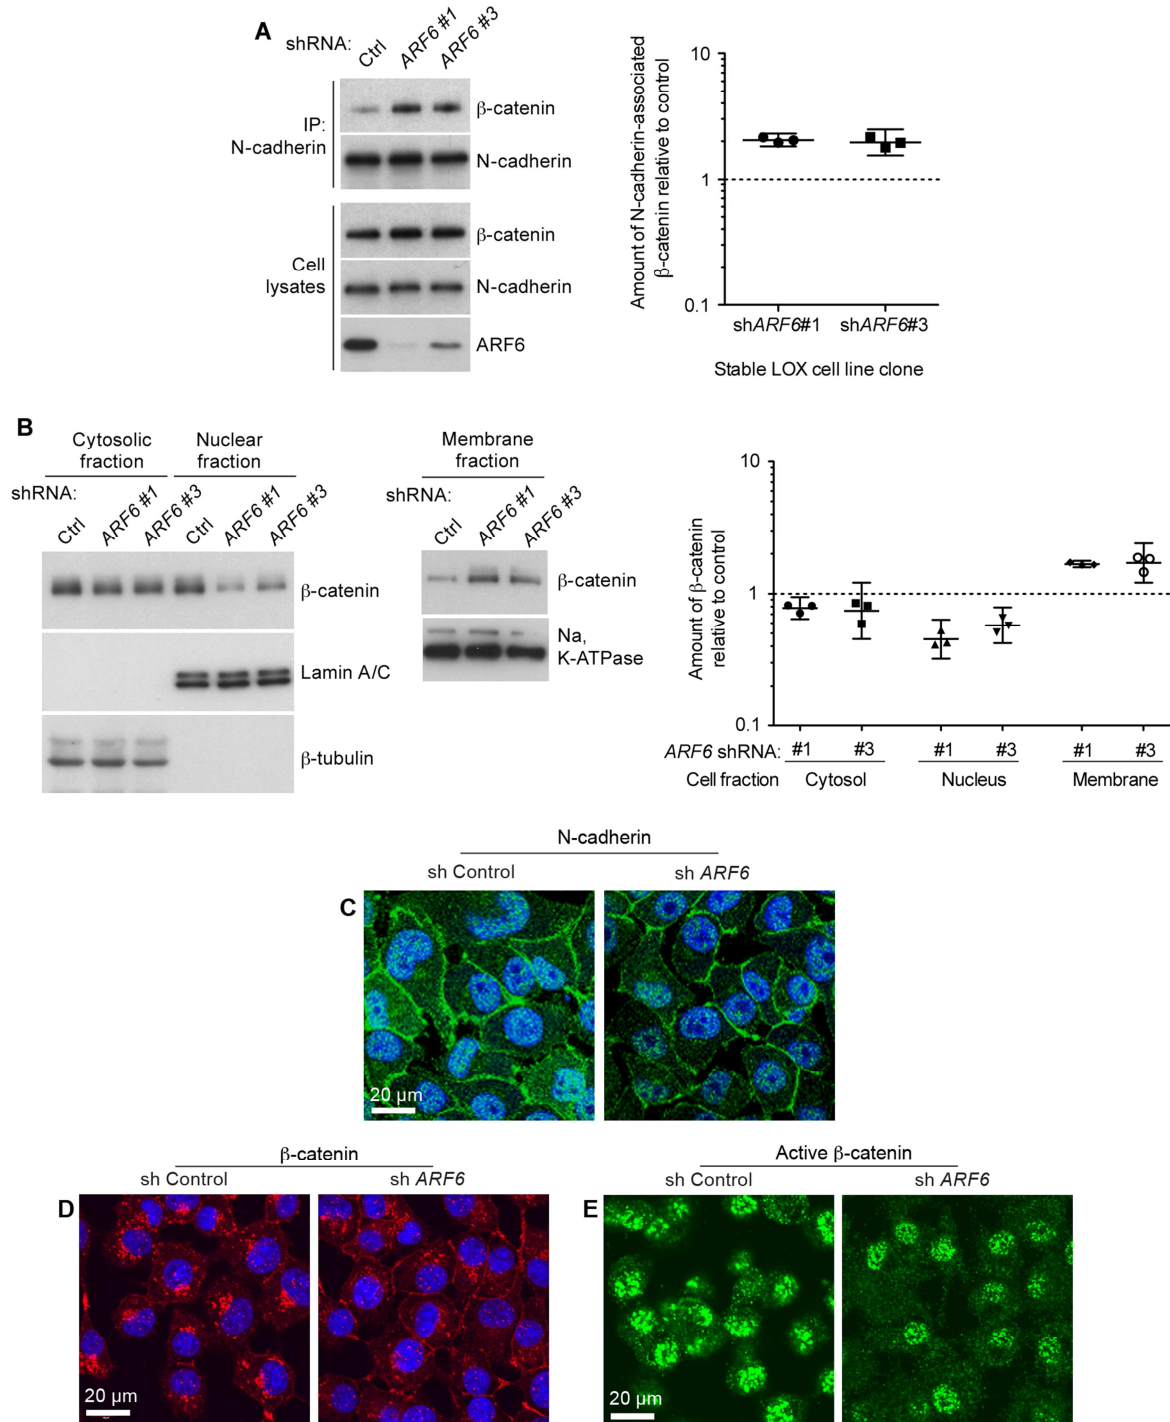

Figure S3

**Figure S3: ARF6 knockdown drives  $\beta$ -catenin from the nucleus to N-cadherin.(A)**

Coimmunoprecipitation of N-cadherin and  $\beta$ -catenin and (B) subcellular fractionation of  $\beta$ -catenin in LOX cells stably expressing Control (Ctrl) or *ARF6* (sh*ARF6* #1 and #3) shRNAs.

Scatter plots show quantification of immunoblots. Data points = individual experiments ( $n=3$ ).

Solid line within data points = geometric mean. Error bars = 95% CI. (C) to (E)

Immunofluorescent staining of (C) N-cadherin, (D) total  $\beta$ -catenin, and (E) active  $\beta$ -catenin in LOX cells stably expressing Ctrl or *ARF6* (sh*ARF6*) shRNAs. ARF6 silencing does not alter N-cadherin localization at the membrane (C) but results in more  $\beta$ -catenin at the cell surface (D) and less in the nucleus (E). (C) to (E) 600X magnification + 2X zoom. For all,  $n=3$  experiments.

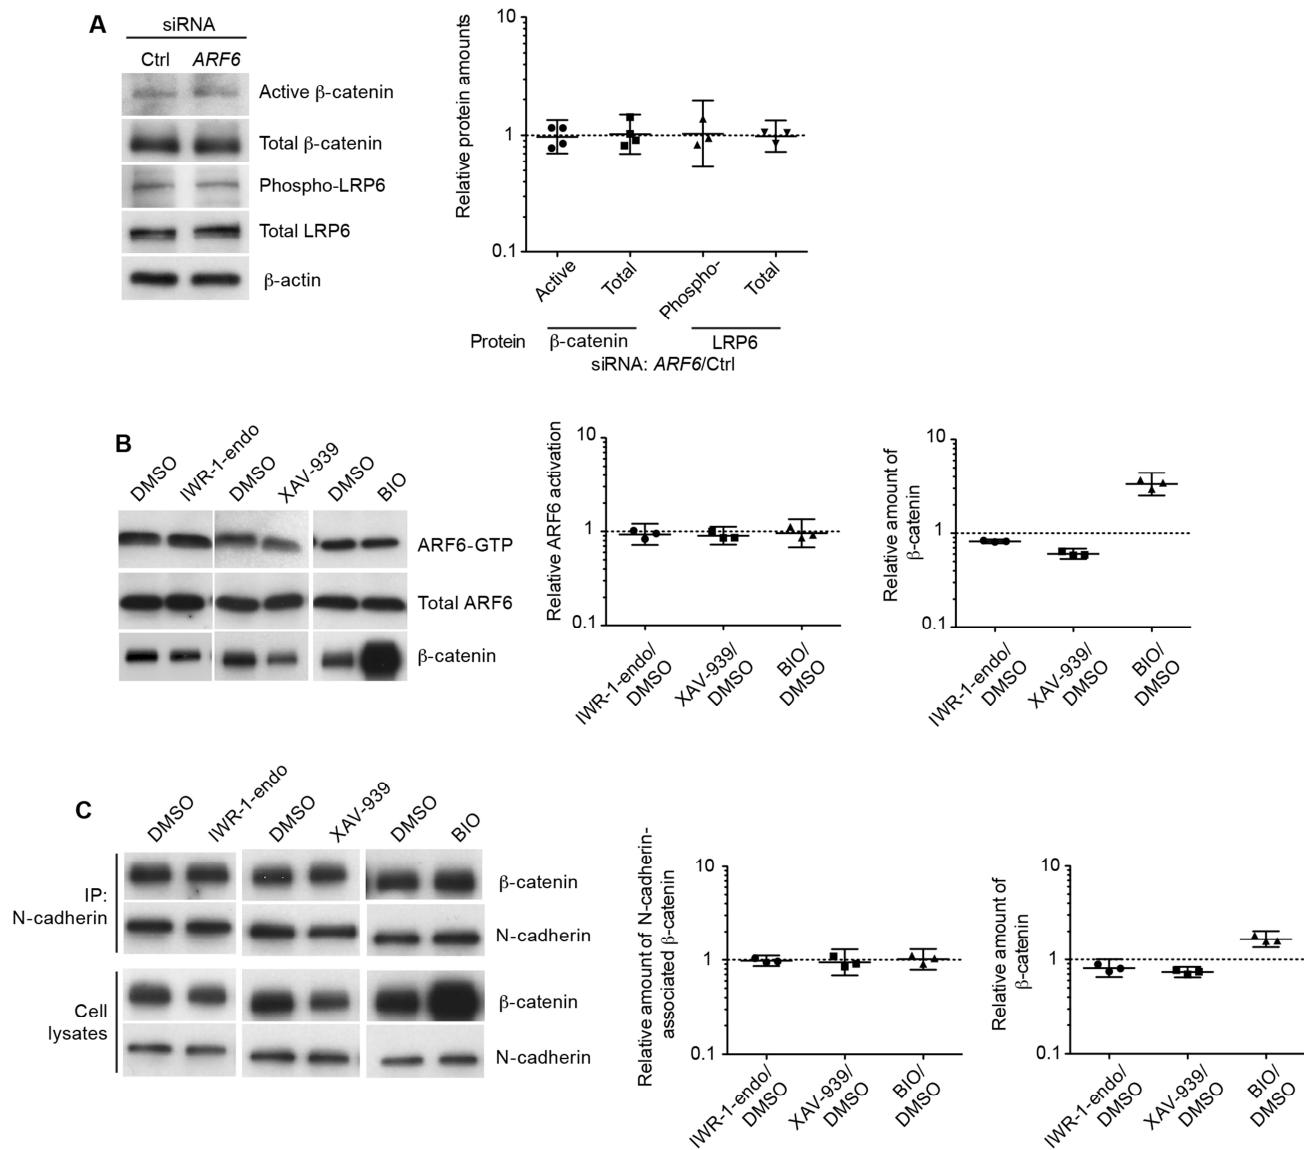

**Figure S4: ARF6, junctional  $\beta$ -catenin, and the canonical destruction complex. (A)**

Immunoblots of active  $\beta$ -catenin, total  $\beta$ -catenin, phosphorylated LRP6, and total LRP6 from LOX cells treated with Control (Ctrl) or *ARF6* siRNAs. (B) GGA3-pulldown of ARF6-GTP in LOX cells treated with IWR-1-endo, XAV-939, or BIO. (C) Coimmunoprecipitation of N-cadherin and  $\beta$ -catenin in LOX cells treated with IWR-1-endo or XAV-939, or BIO. Scatter plot

shows quantification of immunoblots. Data points = individual experiments ( $n=3$ ). Solid line within data points = geometric mean. Error bars = 95% CI.



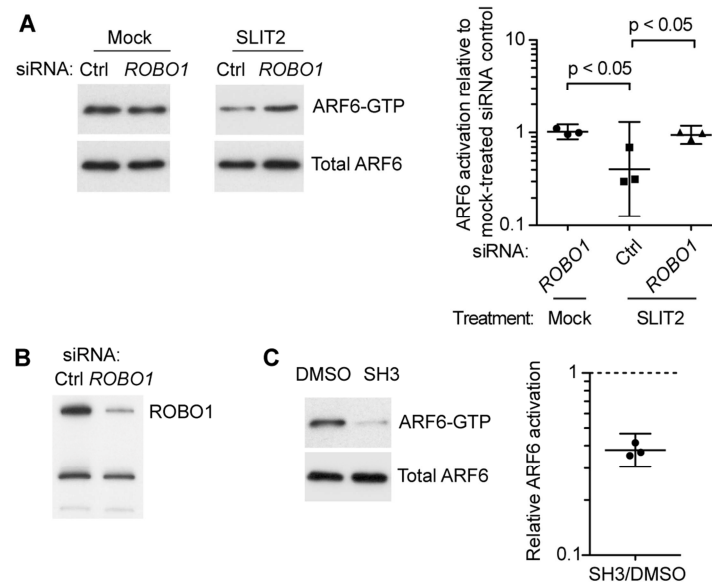

**Figure S5: SLIT2-ROBO1 and SecinH3 inhibit ARF6 activation.** (A) GGA3-pull down of ARF6-GTP in LOX cells transfected with Control (Ctrl) or *ROBO1* siRNAs and treated with Mock or SLIT2. For plotting purposes, geometric mean and 95% CI were estimated separately for each treatment (two-way ANOVA, Tukey's post hoc test with experiment factor treated as a blocking factor in the statistical analysis). (B) Immunoblot of ROBO1 in LOX cells transfected with Ctrl or *ROBO1* siRNAs. (C) GGA3-pull down of ARF6-GTP in LOX cells treated with DMSO or SecinH3 (SH3). (C) Scatter plot shows quantification of immunoblots. Data points = individual experiments ( $n=3$ ). Solid line within data points = geometric mean. Error bars = 95% CI.

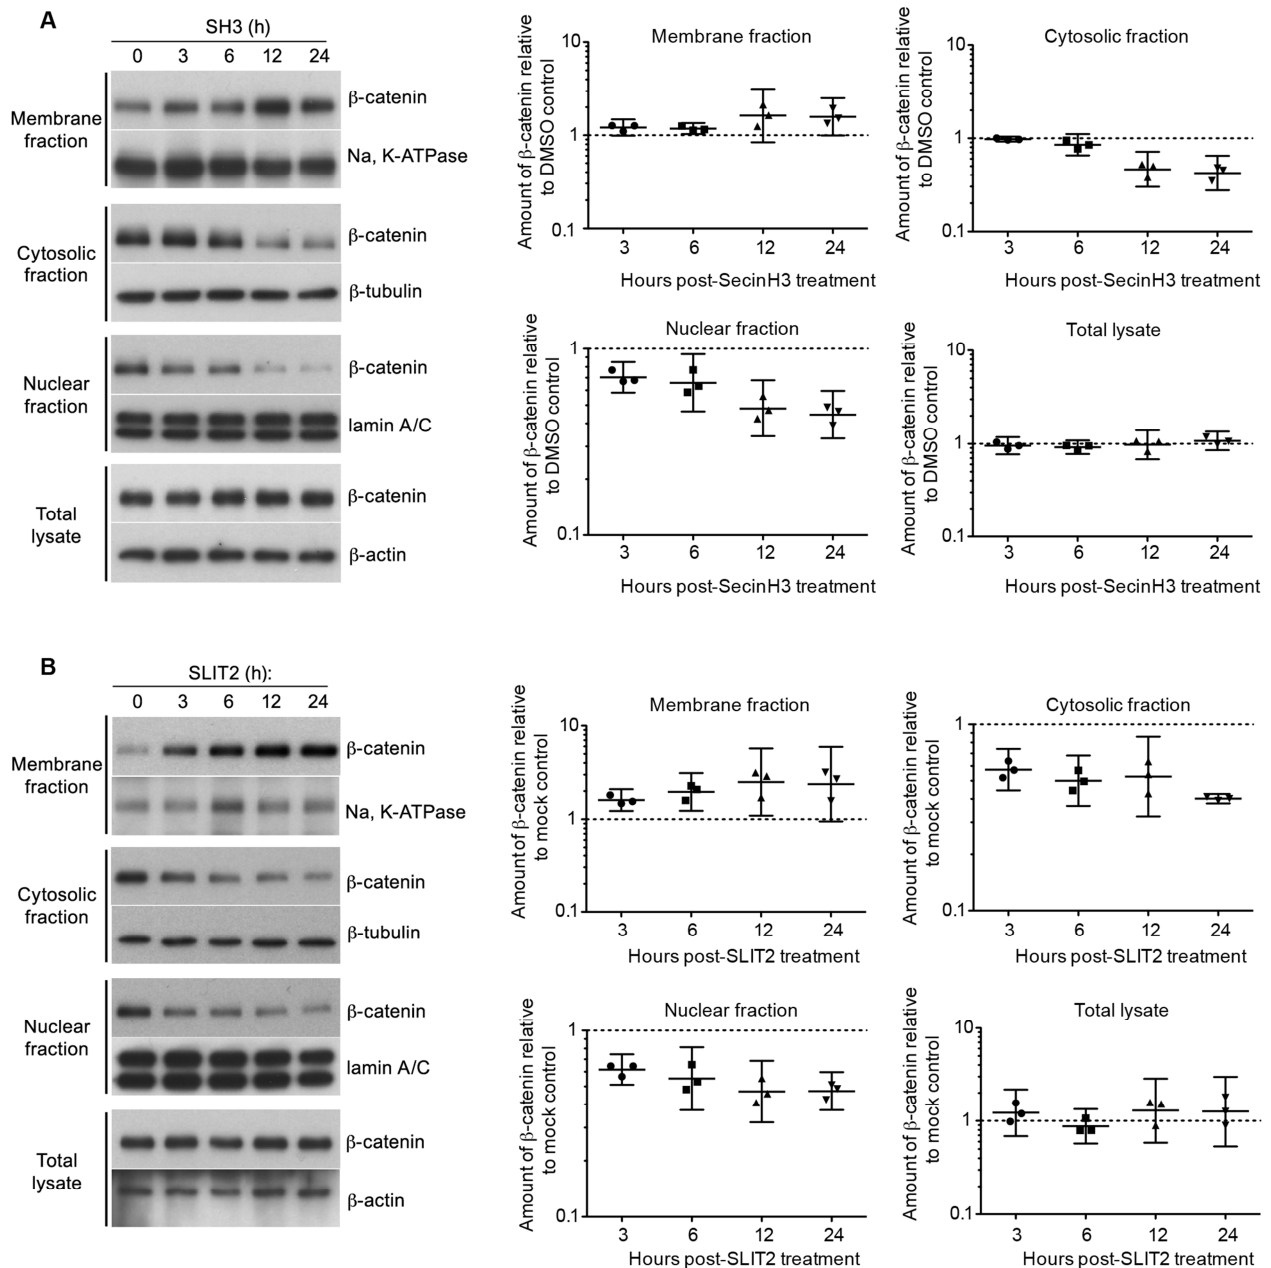

**Figure S6: Time course of  $\beta$ -catenin relocation after ARF6 inhibition.** Subcellular fractionation of LOX cells after treatment with (A) SecinH3 (SH3) or (B) SLIT2 at 0, 3, 6, 12, or 24 hours (h). (A) and (B) A shift in  $\beta$ -catenin from the cytosol and nucleus to the membrane fraction was apparent after 3 hours and persisted at each subsequent interval. Scatter plots show

quantification of immunoblots. Data points = individual experiments ( $n=3$ ). Solid line within data points = geometric mean. Error bars = 95% CI.

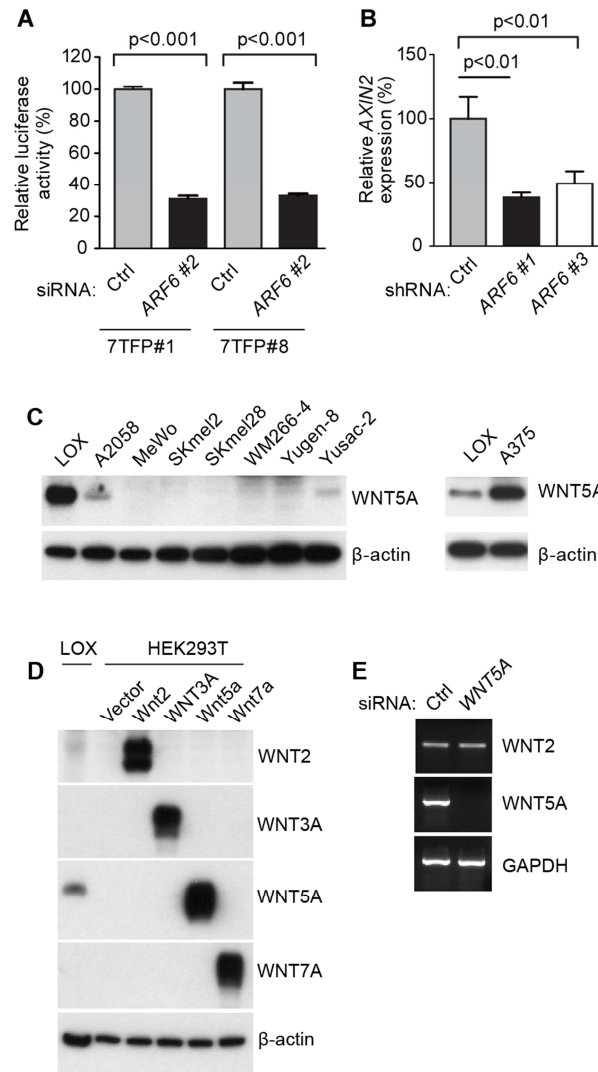

**Figure S7: ARF6-dependent  $\beta$ -catenin transactivation and relative WNT production in melanoma cell lines.** (A) 7TFP luciferase assay and (B) *Axin2* qRT-PCR in LOX cells stably expressing Control (Ctrl) or *ARF6* (shARF6 #1 and #3) shRNAs (related to Fig. 1I). (C) WNT5A is abundant in LOX and A375 cells and present in A2058 and Yusac2 cells. (D) LOX cells produce low amounts of WNT2, but WNT3A and WNT7A were not detected. (D) HEK293T cells with ectopic overexpression of WNT2, WNT3A, WNT5A, or WNT7A act as immunoblot positive controls. (E) *WNT2* expression is not altered following *WNT5A* knockdown (see also

Fig. S6A-B). (A) Two-tailed t test. (B) One-way ANOVA with Dunnett's post hoc test test.

For all, error bars = SD,  $n=3$  experiments.

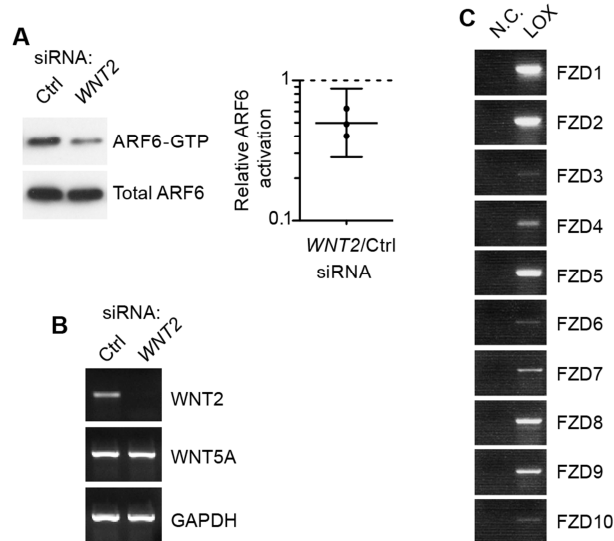

**Figure S8: WNT2 knockdown reduces ARF6 activation.** (A) GGA3 pulldown of ARF6-GTP and (B) confirmation of *WNT2* knockdown with RT-PCR in LOX cells transiently transfected with Control (Ctrl) or *WNT2* siRNAs. (A) Scatter plot shows quantification of immunoblots. Data points = individual experiments ( $n=3$ ). Solid line within data points = geometric mean. Error bars = 95% CI. (B) *WNT5A* mRNA expression, as detected by RT-PCR, is not reduced by siRNA to *WNT2* (related to Fig. S5D). (C) Expression of Frizzled (*FZD*) family members in LOX cells, evaluated by RT-PCR. N.C. = no template control.  $n=3$  experiments.

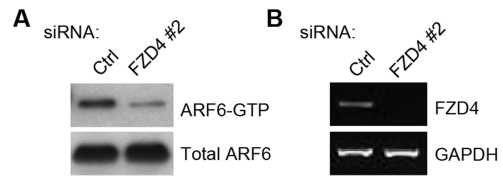

**Figure S9: FZD4 knockdown reduces ARF6 activation.** (A) GGA3 pulldown of ARF6-GTP and (B) confirmation of knockdown by RT-PCR in LOX cells transiently transfected with Control (Ctrl) or *Frizzled 4* sequence #2 (*FZD4* #2) siRNAs. See also Fig. 2D and S2L.

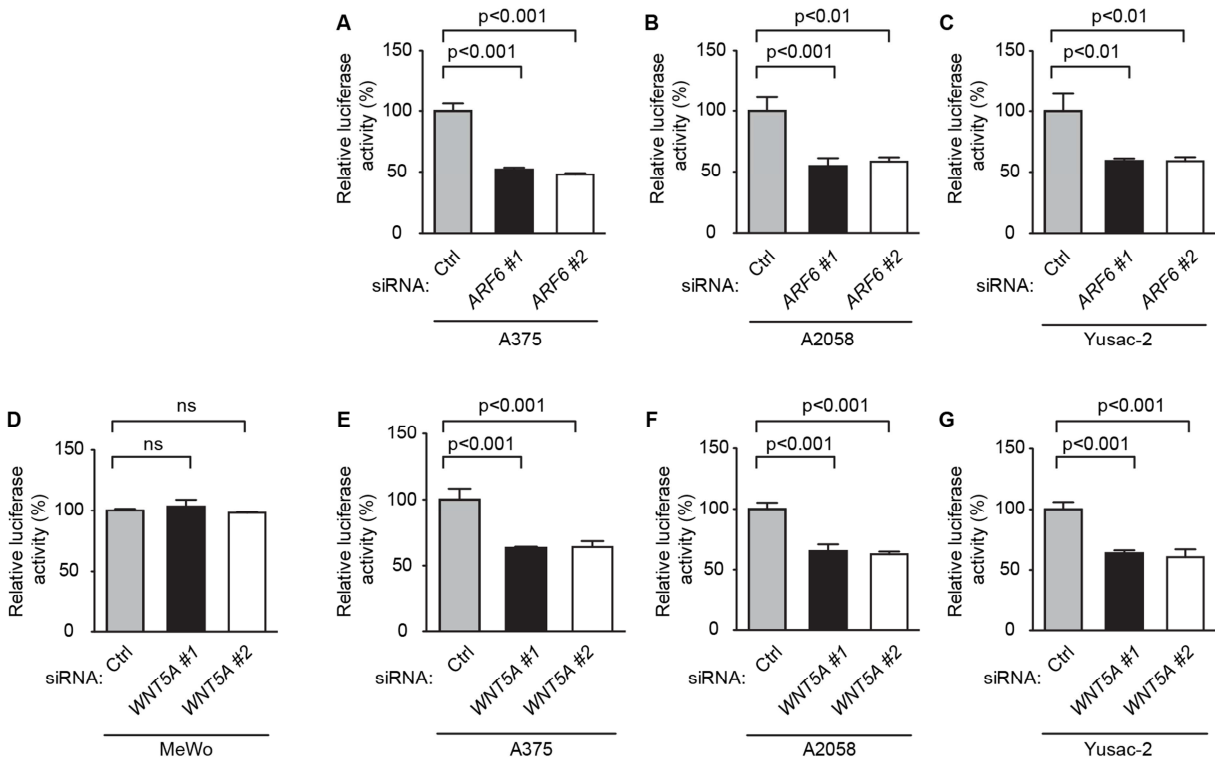

**Figure S10: WNT5A, ARF6, and  $\beta$ -catenin signaling in multiple human melanoma cell**

**lines.** (A) to (G) 7TFP luciferase assay for  $\beta$ -catenin-mediated transcription in A375,

A2058, Yusac-2, and MeWo melanoma cells. (A) to (C) Cells treated with Control (Ctrl) or

*ARF6* (*ARF6* #1 and #2) siRNAs. (D) to (G) Cells treated with Ctrl or *WNT5A* (*WNT5A* #1 and

#2) siRNAs. (D) MeWo cells, which do not produce *WNT5A* (see Fig. S7C), were used as a

negative control to show the specificity of the *WNT5A* siRNAs. For all, one-way ANOVA

followed by Dunnett's post hoc test, error bars = SD,  $n=3$  experiments.



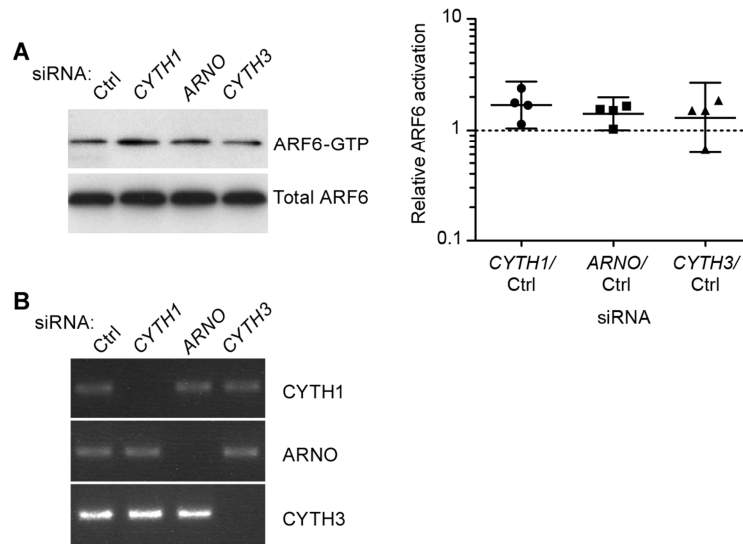

**Figure S11: Cytohesin knockdown does not reduce ARF6 activation.** (A) GGA3 pulldown of ARF6-GTP and (B) confirmation of knockdown by RT-PCR in LOX cells transiently transfected with Control (Ctrl) or *cytohesin 1* (*CYTH1*), *cytohesin-2* (also called *ARNO*), or *cytohesin 3* (*CYTH3*) siRNAs. (A) Scatter plot shows quantification of immunoblots. Data points = individual experiments ( $n=4$ ). Solid line within data points = geometric mean. Error bars = 95% CI.

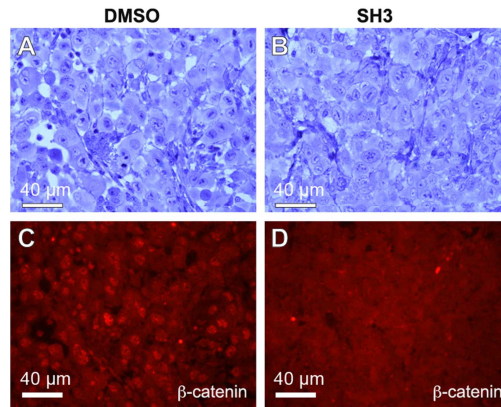

**Figure S12:  $\beta$ -Catenin immunostaining of LOX melanoma xenograft tumors.** (A) to (B) Representative bright field images of hematoxylin-counterstain and (C) to (D) fluorescent images of  $\beta$ -catenin staining (Alk Phos Red) of LOX melanoma xenograft tumors from mice treated with (A) and (C) DMSO vehicle or (B) and (D) SecinH3 (SH3). 400X magnification.  $n=7$  primary tumors from each treatment group.

**Supplementary Table 1. siRNA and shRNA sequences.**

| <b>Target Gene Symbol</b> | <b>siRNA ID</b>             | <b>Sense Sequence 5'to 3'</b> | <b>Vendor</b> |
|---------------------------|-----------------------------|-------------------------------|---------------|
| Control                   | AllStars Neg. Control siRNA |                               | Qiagen        |
| ARF6 #1                   | SI02757286                  | CAACGTGGAGACGGTGACTTA         | Qiagen        |
| ARF6 #2                   | S1565                       | GUCUCAUCUUCGUAGUGGATT         | Ambion        |
| WNT5a #1 ( pooled)        | J-003939-09                 | GCCAAGGGCUCCUACGAGA           | Thermo        |
|                           | J-003939-10                 | GUUCAGAUGUCAGAAGUAU           | Thermo        |
|                           | J-003939-11                 | CAUCAAGAAUGCCAGUAU            | Thermo        |
|                           | J-003939-12                 | GAAACUGUGCCACUUGUAU           | Thermo        |
| WNT5a #2                  | S100051779                  | CCGGATAACCTTGTAACATAT         | Qiagen        |
| FZD4 #1                   | S15840                      | CAGUAUGUGCUAUAUAUUTT          | Ambion        |
| FZD4 #2                   | S100097965                  | TAGGTGATCGATACTTGTCAA         | Qiagen        |
| FZD2                      | S10275743                   | CACGGTCTACATGATCAAATA         | Qiagen        |
| FZD5                      | S102757650                  | TAAGGTTGGCGTTGTAATGAA         | Qiagen        |
| FZD7                      | SI02631237                  | TCACCTACCTGGTGGACATGC         | Qiagen        |
| LRP6 (pooled)             | J-003845-12                 | GCUCAACCGUGAAGUUAUA           | Thermo        |
|                           | J-003845-11                 | CCACAGAGCGAUCACAUUA           | Thermo        |
|                           | J-003845-10                 | CAGAUGAACUGGAUUGUUA           | Thermo        |
|                           | J-003845-09                 | GCAGAUaucagacgAAUUU           | Thermo        |
| ROBO1                     | S103055472                  | CACAAGGGCTCTCAAAGTATA         | Qiagen        |
| WNT2                      | S104271694                  | CAGGAAGGCTGTAAAGCGGTT         | Qiagen        |
| CYTH1                     | S104217185                  | CGGGACAGAGGTTCCGGATAA         | Qiagen        |
| ARNO                      | S100061299                  | CACGCTGTTGGTAATCTTATT         | Qiagen        |
| CYTH3                     | S100061257                  | CAGCATGTTGTGCTCGGACAA         | Qiagen        |
| GEP100                    | S103019408                  | CTGAAGGGTAGCAGTAATGAA         | Qiagen        |
| <b>Target Gene Symbol</b> | <b>shRNA</b>                | <b>Sense Sequence 5'to 3'</b> | <b>Vendor</b> |
| ARF6_#1                   | TRCN0000048003              | GTCAAGTTCAACGTATGGGAT         | SIGMA         |
| ARF6_#3                   | TRCN0000048005              | CTCACATGGTTAACCTCTAACT        | SIGMA         |
|                           |                             |                               |               |
|                           |                             |                               |               |

**Supplementary Table 2. Primer sequences for RT-PCR.**

| Gene    | Sequences (5' to 3')                                    |
|---------|---------------------------------------------------------|
| hFZD1   | (F) gtgagccgaccaaggtgtat<br>(R) cagccggacaagaagatgat    |
| hFZD2   | (F) gcgtcttctccgtgctctac<br>(R) ctgttggtgaggcgagtgtga   |
| hFZD3   | (F) tgagtgttcgaagctctatgg<br>(R) atcacgcacatgcagaaaag   |
| hFZD4   | (F) ccaacatggctgttgaaatg<br>(R) tcaccaaccatttctctc      |
| hFZD5   | (F) tgctaccagccgtccttcagt<br>(R) ccatgccgaagaagtagaccag |
| hFZD6   | (F) attttggtgtccaaggcatc<br>(R) tattgcaggctgtgctatcg    |
| hFZD7   | (F) gtgcagtgttctcccgaact<br>(R) gaacggtaaagagcgtcgag    |
| hFZD8   | (F) tcttgcgctcacatggttc<br>(R) tgtagagcacggtgaacagg     |
| hFZD9   | (F) cgctggcttctactgctc<br>(R) agaagaccccgatcttgacc      |
| hFZD10  | (F) gcggtgaagaccatctg<br>(R) gcacggtgtacagcacagag       |
| hGAPDH  | (F) accacagtccatgcatcac<br>(R) tccaccacctgttgcctgt      |
| hAxi2   | (F) ctggctttggtgaactgttg<br>(R) agttgctcacagccaagaca    |
| hWNT2   | (F) actctcaggacatgctggct<br>(R) acgaggtcattttcgttg      |
| hWNT5a  | (F) cccatgcagtacatcggag<br>(R) cactctcgtaggagcccttg     |
| hGEP100 | (F) gccttagcaacgatgcatc<br>(R) cacatggctctcattggtctt    |
| CYTH1   | (F) ctgtgaggaaggttatcgg<br>(R) tccagagtagtccagttagg     |
| ARNO    | (F) tgtggtcttgagggtggagtc<br>(R) ggctgctgctgcttctgg     |
| CYTH3   | (F) ggagaagcagcaggaagg<br>(R) tctaactcagcaccacagc       |
